# Supplementary material for: Biochemical characterization of the Nocardia lactamdurans ACV synthetase
Source: PLOS journal article supplement (doi:10.1371/journal.pone.0231290), 2020-04-10

# Biochemical characterization of the *Nocardia lactamdurans* ACV synthetase

Riccardo Iacovelli, Reto D. Zwahlen, Roel A. L. Bovenberg,  
and Arnold J. M. Driessen

## S1\_raw\_images

SDS-PAGE images were taken with a Fuji ImageQuant LAS-4000 System and exported as high-resolution TIFF files using the AIDA image analysis software.

The following gel picture was used to generate Fig 2.

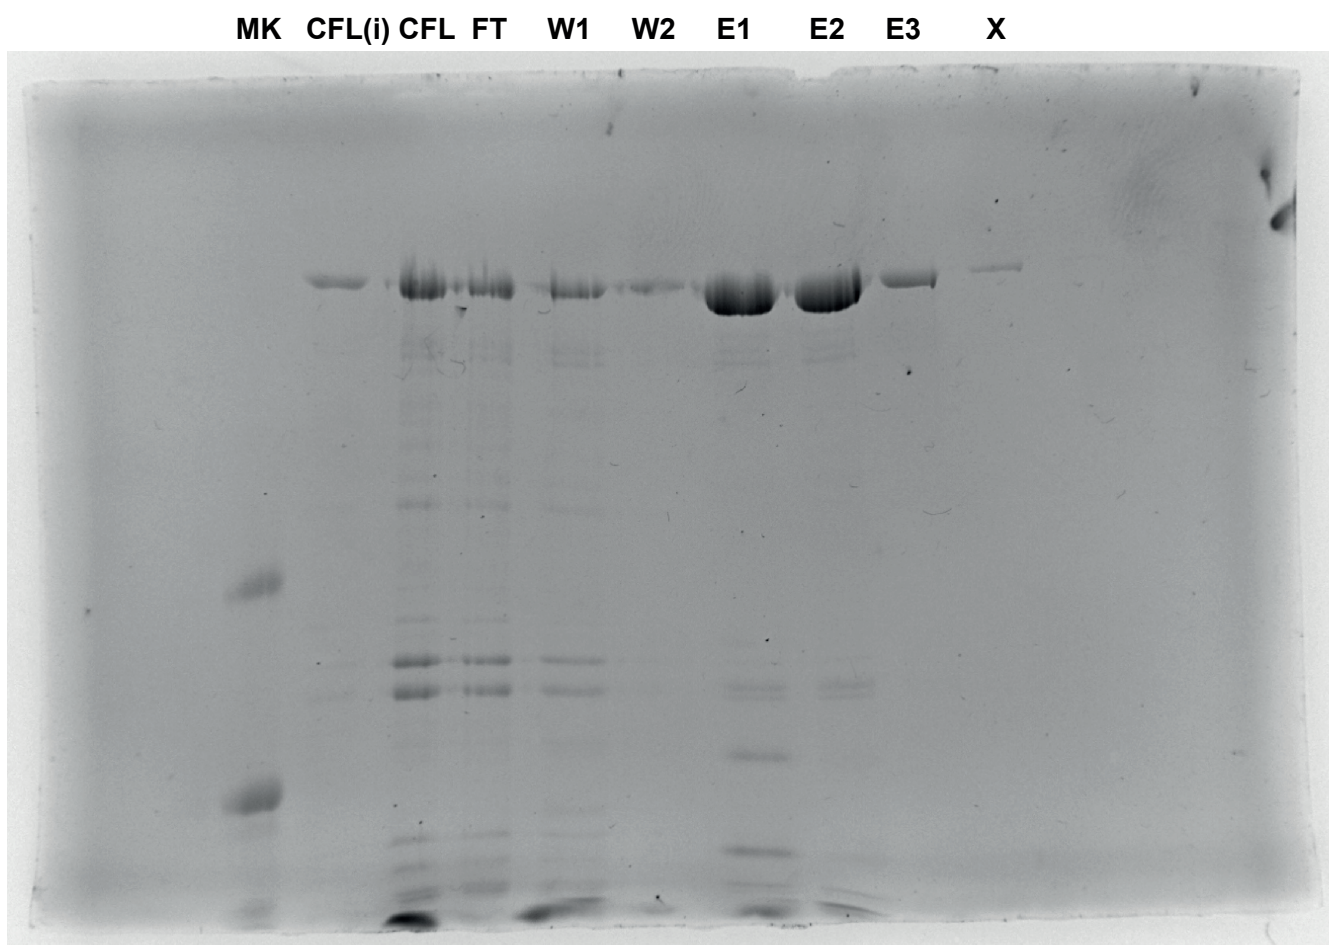

The following gel pictures were used to generate Fig 6A.

**MK    N/ACVS    VCVS    TCVS    LCVS    X    YCVS    PcANICVS**

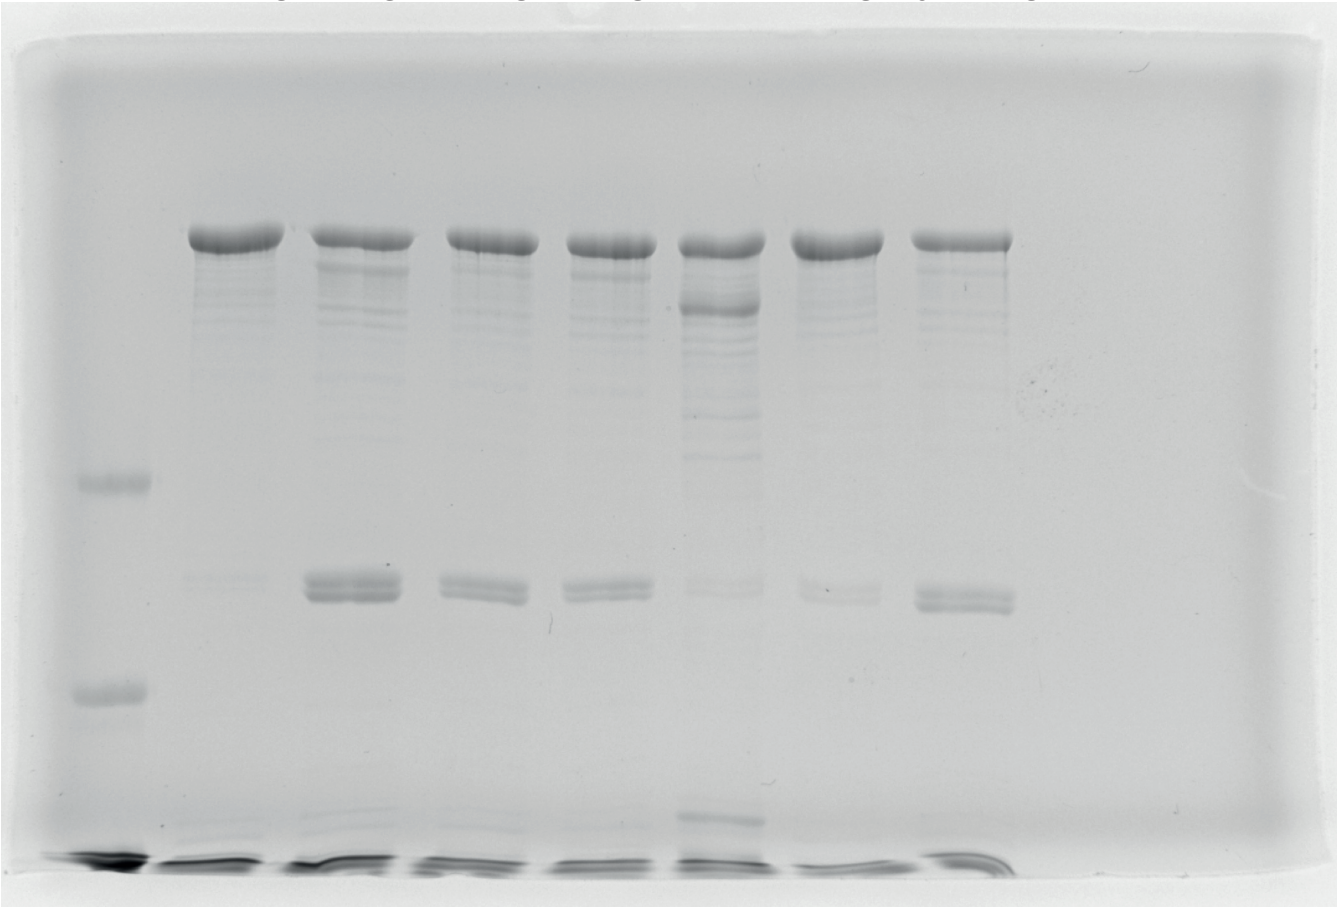

**MK    X    X    X    X    X    X    X    ECVS    DCVS    X    X    X**

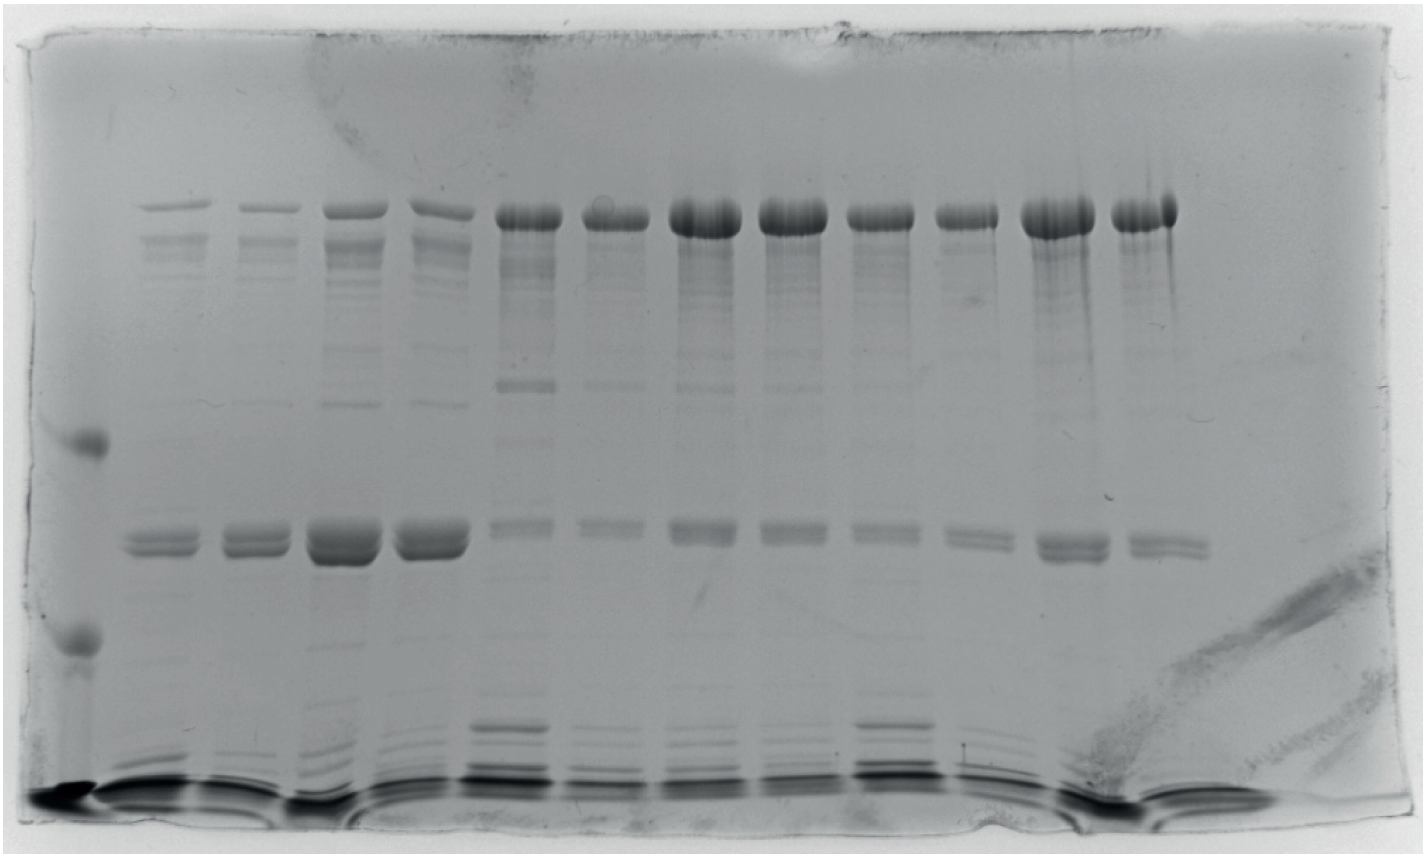

Supplement: S5 (10.1371/journal.pone.0231290.s005) [file journal.pone.0231290.s005]
